# Supplementary material for: The WMI Rat of Premature Cognitive Aging Presents Intrinsic Vulnerability to Oxidative Stress in Primary Neurons and Astrocytes Compared to Its Nearly Isogenic WLI Control
Source: MDPI journal article supplement (doi:10.3390/ijms25031692), 2024-01-30
Supplement: s1 [file s1]

*Supplemental Material:*

# **The WMI Rat of Premature Cognitive Aging Presents Intrinsic Vulnerability to Oxidative Stress in Primary Neurons and Astrocytes Compared to Its Nearly Isogenic WLI Control**

**Adriana Ferreira <sup>1</sup>, Aspen Harter <sup>2</sup>, Sana Afreen <sup>1</sup>, Karoly Kanai <sup>3</sup>, Sandor Batori <sup>3</sup> and Eva E Redei <sup>2,\*</sup>**

<sup>1</sup> Department of Cell and Developmental Biology, Feinberg School of Medicine, Northwestern University, Chicago, IL 60611, USA; a-ferreira@northwestern.edu (A.F.); sana.afreen@law.northwestern.edu (S.A.)

<sup>2</sup> Department of Psychiatry and Behavioral Sciences, Feinberg School of Medicine, Northwestern University, Chicago, IL 60611, USA; aspenharter2024@u.northwestern.edu

<sup>3</sup> Department of Organic Chemistry and Technology, Budapest University of Technology and Economics, Budapest, 1111, Hungary; kkanai@edu.bme.hu (K.K.); batori.sandor@edu.bme.hu (S.B.)

\* Correspondence: e-redei@northwestern.edu; Tel.: +1-(312)-908-1791

Supplemental Table 1. Primer sequences for quantitative RT-PCR

| Gene          |          | Sequence 5'-3'                  |
|---------------|----------|---------------------------------|
| <i>Igf2</i>   | <i>F</i> | TCA GCA AGT GCC TAA AGA ATG G   |
|               | <i>R</i> | TGG GTG GAT GTC CAG TCA AA      |
| <i>Igf2r</i>  | <i>F</i> | CAG TGG GTG ACT CAC TTT TGA GAA |
|               | <i>R</i> | GCC CGT AGT GGT GTT AAA TTC C   |
| <i>Cat</i>    | <i>F</i> | CAG GGA TGC GAT GTT GTT TCC     |
|               | <i>R</i> | AAG GTG TGT GAG CCA TAG CC      |
| <i>Sod1</i>   | <i>F</i> | CAG AAG GCA AGC GGT GAA C       |
|               | <i>R</i> | CCA TGC TCG CCT TCA GTT AAT C   |
| <i>Gpx1</i>   | <i>F</i> | TCA GTT CGG ACA TCA GGA GAA T   |
|               | <i>R</i> | TCA CCA TTC ACC TCG CAC TT      |
| <i>Gpx2</i>   | <i>F</i> | TCG CTT ACA TCG CCA AGT CT      |
|               | <i>R</i> | CCT CAT TCT GAC AGT TCT CCT GA  |
| <i>Psen1</i>  | <i>F</i> | TTG ATC GGC CTG TGC CTT A       |
|               | <i>R</i> | CCG GCA ACG CCT TCT TGA         |
| <i>Snca</i>   | <i>F</i> | GAT GGG CAA GGG TGA AGA AG      |
|               | <i>R</i> | GCT AGG GTC CAC AGG CAT GT      |
| <i>Snca</i>   | <i>F</i> | AAG TGT AAC CTC GGT GGC TG      |
|               | <i>R</i> | TCT TGC TCT TTG GCC TCC TG      |
| <i>Mt-col</i> | <i>F</i> | ATT GGA GGC TTC GGG AAC TG      |
|               | <i>R</i> | AGA TAG AAG ACA CCC CGG CT      |
| <i>Mt-co2</i> | <i>F</i> | TGG CTT ACA AGA CGC CAC AT      |
|               | <i>R</i> | TGG GCG TCT ATT GTG CTT GT      |
| <i>Mt-co3</i> | <i>F</i> | AAG GCC ACC ACA CCC CTA TT      |
|               | <i>R</i> | TAA TTC CTG TTG GGG GTC AGC     |
| <i>Mt-nd3</i> | <i>F</i> | GAC CAA CAA GTT CTG CAC GC      |
|               | <i>R</i> | AGG GGG AGT AGT AAG GCG AT      |
| <i>Gapdh</i>  | <i>F</i> | CAA CTC CCT CAA GAT TGT CAG CAA |
|               | <i>R</i> | GGC ATG GAC TGT GGT CAT GA      |

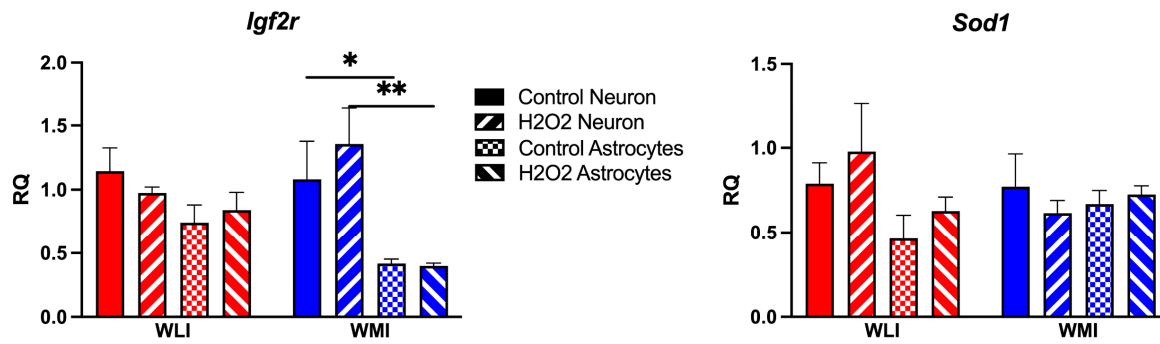

**Supplemental Figure 1. *Igf2r* and *Sod 1* transcript levels did not change in response to 50mM  $H_2O_2$  treatment.** WMI hippocampal neurons expressed greater levels of *Igf2r* compared to WMI astrocytes. Values are mean  $\pm$  SEM from n=3-4/strain/cell type/treatment. \*p<0.05, \*\*p<0.01, comparisons as marked.
